# Supplementary material for: Progression of naive intraepithelial neoplasia genome to aggressive squamous cell carcinoma genome of uterine cervix
Source: PubMed Central journal article supplement (PMC4414197; doi:10.18632/oncotarget.2981), 2015-01-23
Supplement: oncotarget-06-4385-s001.pdf [file oncotarget-06-4385-s001.pdf]

## SUPPORTING INFORMATION FIGURES AND TABLES

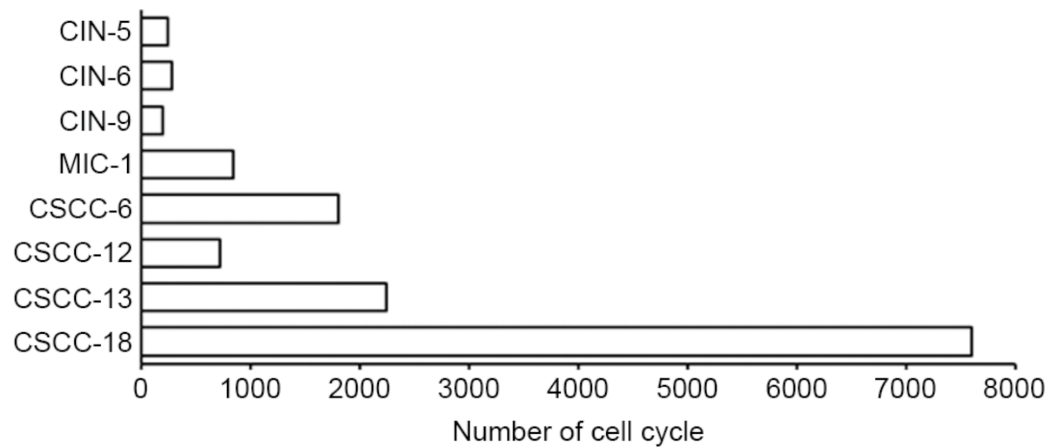

**Supporting Information Figure S1: Somatic mutation-based estimation of evolutionary ages.** The number of cell cycles estimated by an evolutionary model that uses somatic mutations as molecular clocks are shown for eight cervical neoplasia genomes. In this model, we used a model previously described for colorectal and pancreatic cancer genomes [16, 17]. From the mutation rate per base pair estimated from nonsynonymous mutations in colorectal cancer genomes ( $5 \times 10^{-10}$  mutations per base pair per generation) [16], we calculated the mutation rate of  $r = 50.0 \times 10^6 \times 5 \times 10^{-10} \approx 0.025$  per generation or cell cycle. The number of the cell divisions required to obtain  $N$  mutations follows a distribution with a mean of  $N/r$  [17]. Here, we were interested in the number of mutations obtained by a founder cell since its first cell division until the emergence of the last common ancestor in a single lineage. Unlike previous studies that selected clonal mutation based on the comparison between primary versus metastasis regions [16] or regional clonality in primary tumor masses [17], we selected clonally fixed mutations with manually determined mutant allele frequency cutoffs.

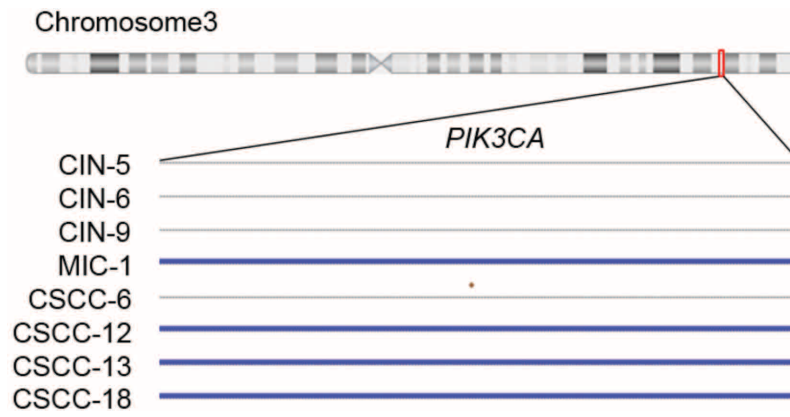

**Supporting Information Figure S2: Genetic alterations in *PIK3CA* gene.** All of the MIC/CSCCs showed genetic alterations in *PIK3CA* gene either by CNAs or somatic mutations. The blue denote the copy number gains and brown star represent the point mutation.

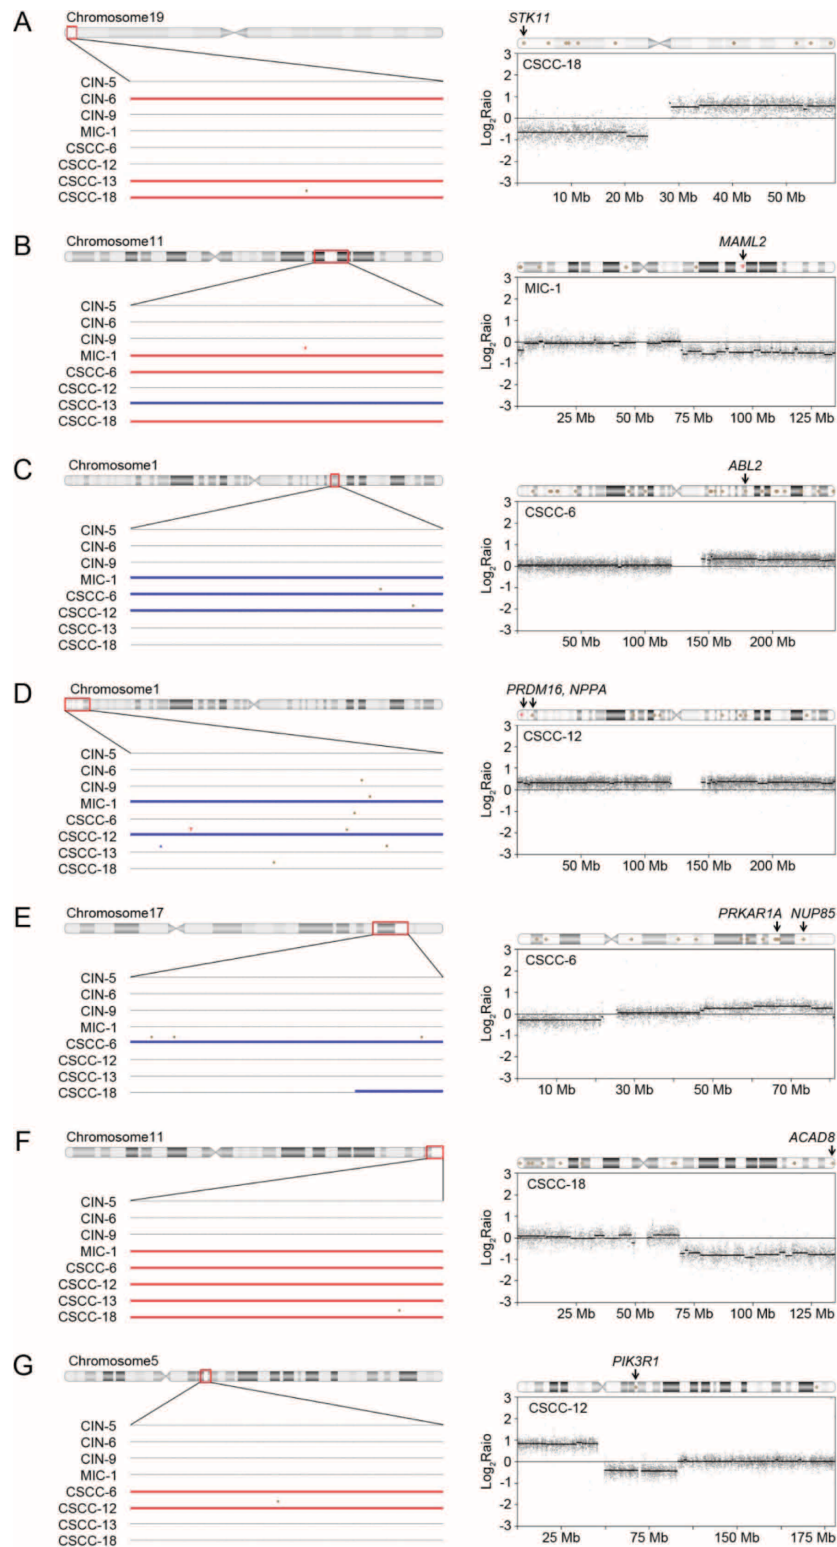

**Supporting Information Figure S3: Mutations co-occurred with CNAs.** Nine mutations with the cancer Gene Census or with the putative driver genes co-occurred with CNAs in the same patients. Copy number and mutation profiles in the eight cervical neoplasia genomes are shown in left panel. The blue denote the copy number gains and the red denote the copy number losses. Regarding the mutations, red triangles represent the indels and brown diamonds represent the point mutations. Examples of the co-occurrence are shown in right panel. The x-axis represents the genomic location and the y-axis represents signal intensities on the  $\log_2$  scale.

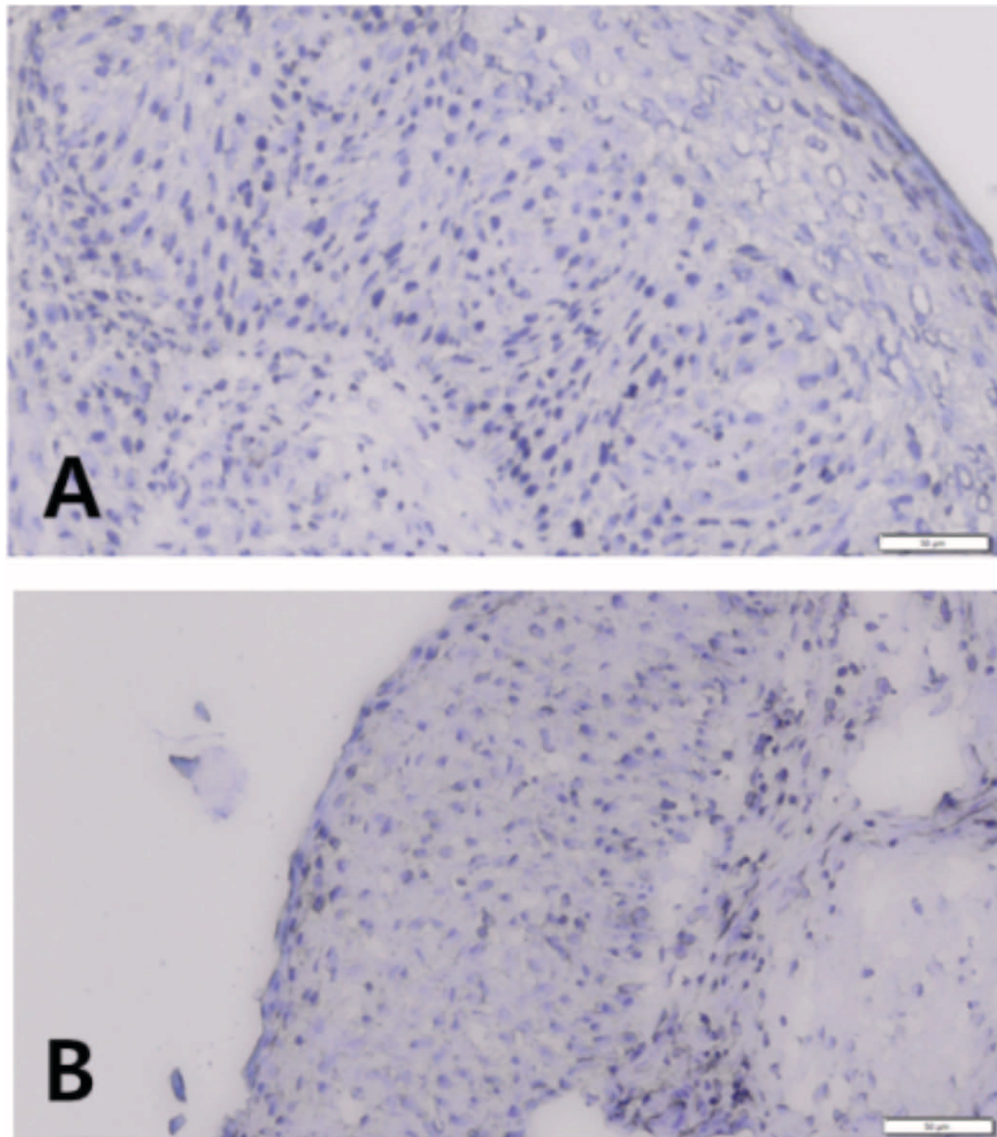

**Supporting Information Figure S4: Representative histology of CIN before the microdissection.** Unfixed frozen tissues from CIN were cut and lightly stained with hematoxylin. The morphology of neoplastic cells of CIN 2 (A) and CIN 3 (B) are good enough to be differentiated from nonneoplastic cells.

**Supporting Information Table S1: The description of whole-exome sequencing data**

| Samples* | Sequencing reads | Mapped (%)         | Coverage (mean)** | % of bases ( $\geq 20$ reads)** |
|----------|------------------|--------------------|-------------------|---------------------------------|
| CIN_5N   | 66,310,825       | 64,482,875 (97.2%) | 84.51             | 87.1                            |
| CIN_5T   | 49,135,258       | 48,044,097 (97.8%) | 61.34             | 83.2                            |
| CIN_6N   | 47,709,875       | 46,574,916 (97.6%) | 60.45             | 83.0                            |
| CIN_6T   | 63,541,303       | 62,012,386 (97.6%) | 80.24             | 86.2                            |
| CIN_9N   | 54,638,730       | 53,317,826 (97.6%) | 67.95             | 83.4                            |
| CIN_9T   | 56,763,081       | 55,360,723 (97.5%) | 70.89             | 83.8                            |
| MIC_1N   | 52,736,101       | 51,777,623 (98.2%) | 67.68             | 82.9                            |
| MIC_1T   | 62,496,250       | 61,299,398 (98.1%) | 79.21             | 85.8                            |
| CSCC_6N  | 50,658,090       | 49,944,276 (98.6%) | 62.97             | 81.9                            |
| CSCC_6T  | 54,792,170       | 54,132,305 (98.8%) | 69.30             | 83.1                            |
| CSCC_12N | 64,421,217       | 63,557,387 (98.7%) | 80.87             | 85.9                            |
| CSCC_12T | 55,893,905       | 55,231,335 (98.8%) | 69.53             | 82.9                            |
| CSCC_13N | 60,110,919       | 59,381,257 (98.8%) | 75.25             | 85.0                            |
| CSCC_13T | 54,925,765       | 54,234,625 (98.7%) | 68.56             | 81.9                            |
| CSCC_18N | 52,090,557       | 51,422,761 (98.7%) | 64.52             | 81.8                            |
| CSCC_18T | 59,114,388       | 58,374,984 (98.8%) | 74.07             | 83.4                            |

\*The neoplasia and matched normal genomes are discriminated with the use of 'T' and 'N', respectively.

\*\*The mean coverage and the % of bases ( $\geq 20$  reads) were calculated onto the targeted regions (Agilent SureSelect 50Mb exon).

### Supporting Information Table S2: Somatic point mutations and indels identified across eight cervical neoplasia genomes

### Supporting Information Table S3: Copy number alterations identified across eight cervical neoplasia genomes

**Supporting Information Table S4: Recurrent CNA regions**

| Position                  | CytoBand    | Event | CIN<br>(N=3) | MIC/CSCC<br>(N=5) | CancerGene*                                                                                                        |
|---------------------------|-------------|-------|--------------|-------------------|--------------------------------------------------------------------------------------------------------------------|
| 1:144,009,907–237,465,552 | q21.1–q43   | Gain  | 0            | 4                 | <i>PDE4DIP, BCL9, ARNT, TPM3, MUC1, PRCC, NTRK1, SDHC, FCGR2B, PBX1, ABL2, TPR, MDM4, ELK4, SLC45A3, H3F3A, FH</i> |
| 2:232,656,217–234,233,938 | q37.1       | Loss  | 1            | 2                 |                                                                                                                    |
| 3:0–88,914,346            | p26.3–p11.1 | Loss  | 0            | 4                 | <i>SRGAP3, FANCD2, VHL, PPARG, RAF1, XPC, MLH1, MYD88, CTNNB1, SETD2, BAP1, PBRM1, FHIT, MITF, FOXP1</i>           |
| 3:112,344,459–198,022,430 | q13.2–q29   | Gain  | 0            | 4                 | <i>GATA2, RPN1, FOXL2, WWTR1, GMPS, MLF1, EVI1, PIK3CA, SOX2, ETV5, EIF4A2, BCL6, LPP, TFRC</i>                    |
| 4:4,244,789–49,063,301    | p16.3–p11   | Loss  | 1            | 2                 | <i>SLC34A2, PHOX2B</i>                                                                                             |
| 4:87,413,472–87,591,066   | q21.3       | Loss  | 0            | 3                 |                                                                                                                    |
| 4:98,447,690–98,964,444   | q22.3–q23   | Loss  | 0            | 3                 |                                                                                                                    |
| 6:170,299,004–171,115,067 | q27         | Loss  | 1            | 2                 |                                                                                                                    |
| 11:73,147,423–135,006,516 | q13.4–q25   | Loss  | 0            | 5                 | <i>PICALM, MAML2, BIRC3, ATM, DDX10, POU2AF1, SDHD, PAFAH1B2, PCSK7, MLL, DDX6, CBL, ARHGEF12, FLII</i>            |
| 19:320,894–2,293,032      | p13.3       | Loss  | 1            | 2                 | <i>FSTL3, STK11, TCF3, GNAI1, SH3GL1</i>                                                                           |

\*Cancer Gene census: <http://www.cancer.sanger.ac.uk/cosmic/census>

### Supplementary Table S5: Gene ontology analysis of mutations using DAVID

### Supplementary Table S6: Mutations that co-occurred with CNAs
